# Supplementary material
Source: HighWire-hosted journal article supplement (http://www.qdcxjkg.com/highwire/filestream/121512/field_highwire_adjunct_files/2/ERJ-00159-2015_Fig_E3.pdf)

Fig E3

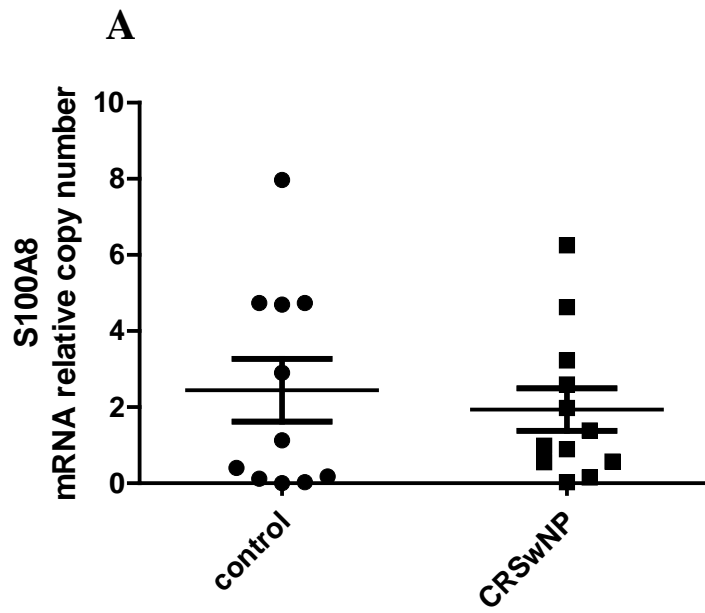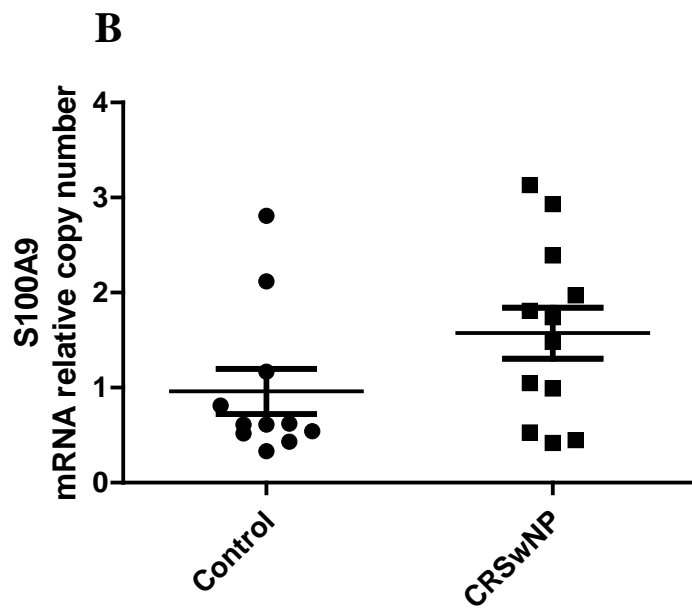

Supplement: ERJ-00159-2015_Fig_E3.pdf [file ERJ-00159-2015_Fig_E3.pdf]
